# Supplementary material for: m6A-Related lncRNA Signature Is Involved in Immunosuppression and Predicts the Patient Prognosis of the Age-Associated Ovarian Cancer
Source: Hindawi journal article supplement (doi:10.1155/2022/3258400), 2022-08-10

■ Missense\_Mutation   
 ■ In\_Frame\_Del   
 ■ Splice\_Site   
 ■ Frame\_Shift\_Ins   
 ■ Multi\_Hit  
■ Nonsense\_Mutation   
■ In\_Frame\_Ins   
■ Frame\_Shift\_Del   
■ Translation\_Start\_Site

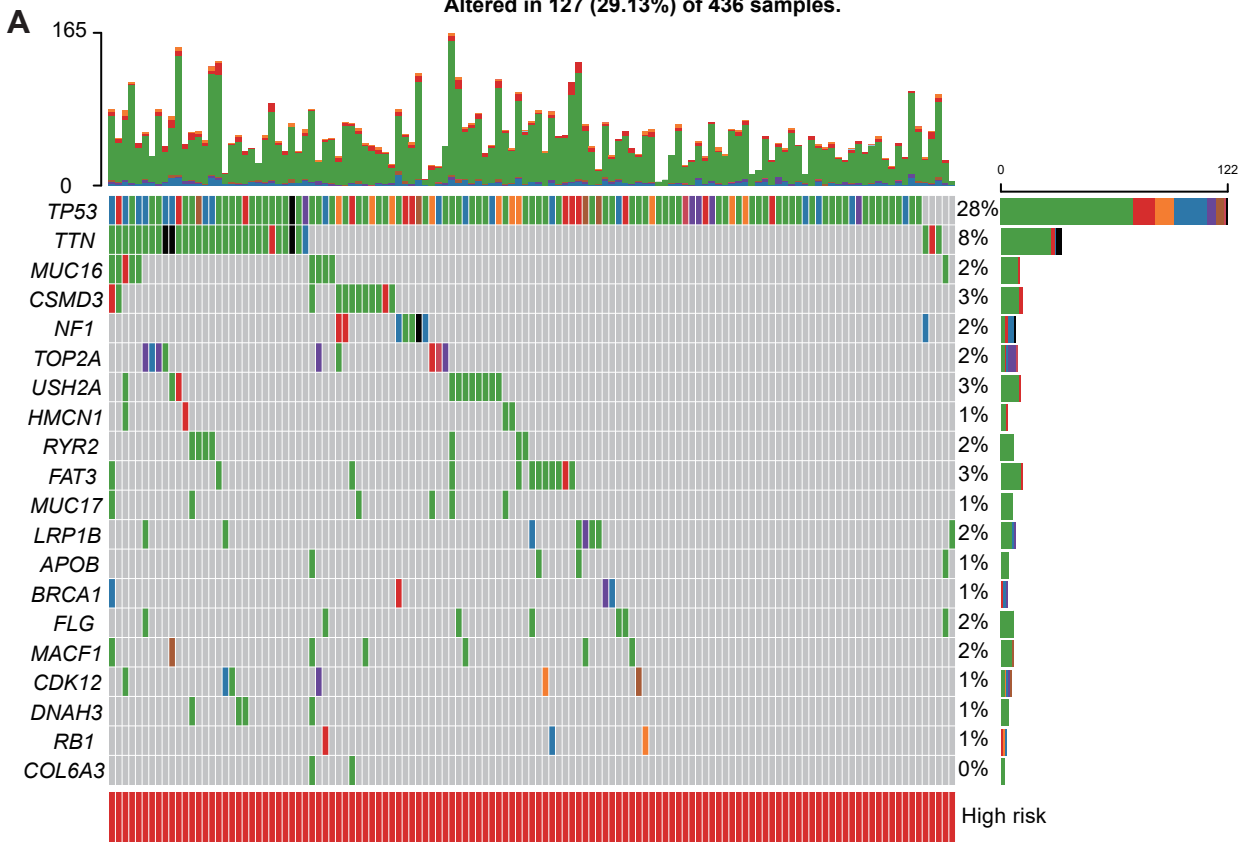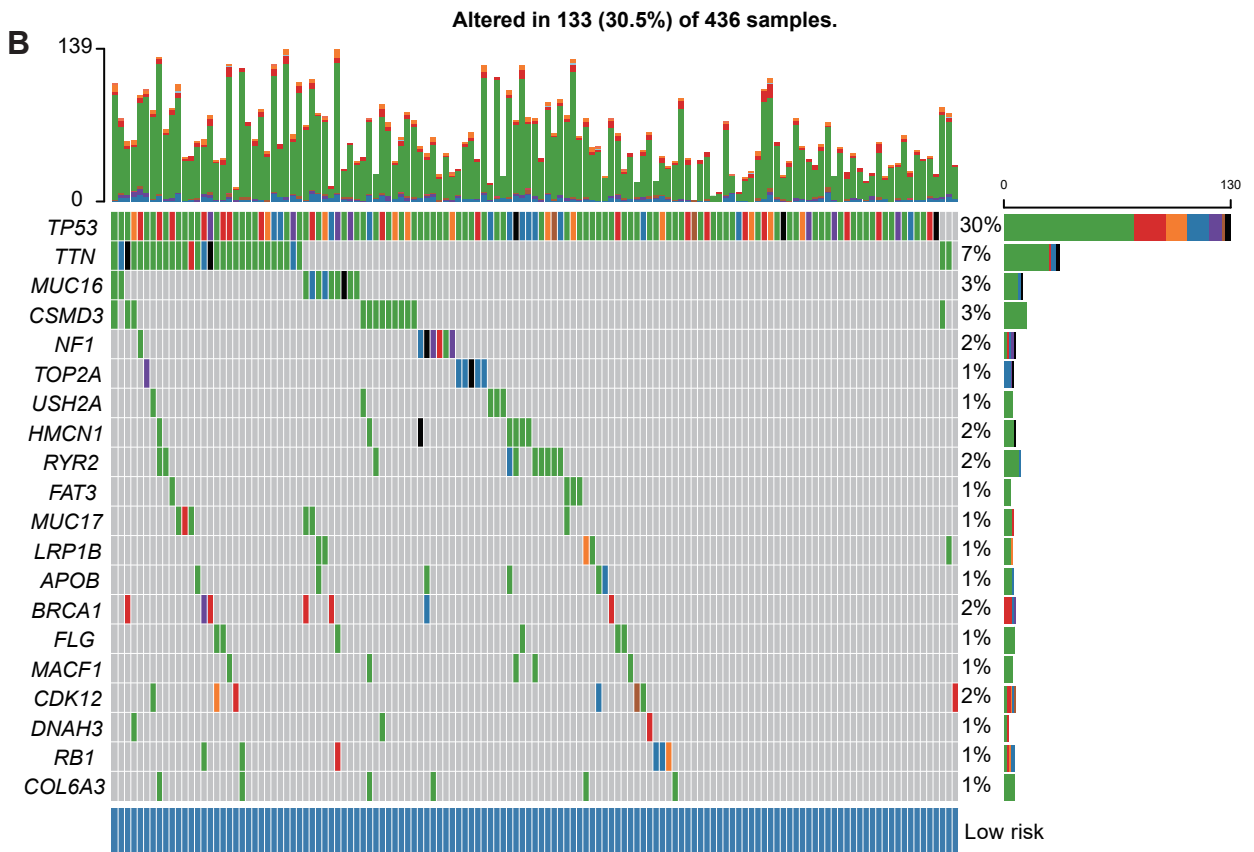

Supplement: f1 [file 3258400.f1.pdf]
